# Supplementary material for: Handling in the Production of Wire-Based Linked Micro Parts
Source: Micromachines (Basel). 2017 May 25;8(6):169. doi: 10.3390/mi8060169 (PMC6190101; doi:10.3390/mi8060169)
Supplement: Supplementary file 1 [file micromachines-08-00169-s001.xlsx]

## Sheet: Tabelle1
Figure 7
x	0	1	2	3	4	5	6	7	8	9	10
G1 - 0	762	762	761	760	758	757	756	757	756	756	757
	765	765	763	762	760	758	756	756	756	756	756
	763	762	761	760	758	756	754	754	754	754	755
	763	762	762	760	758	757	755	755	755	755	756
	763	763	762	760	758	757	755	755	754	754	755
	765	762	761	760	757	756	754	754	753	753	754
	765	763	762	761	759	758	756	757	756	757	757
	766	765	763	761	759	758	756	756	756	756	756
	765	764	762	761	758	757	756	755	755	755	755
	766	765	763	761	759	757	756	756	755	756	756
	765	765	763	761	759	757	756	756	755	755	756
	765	765	763	762	760	758	756	756	755	755	756
G2 - 0	843	844	844	844	845	847	848	849	849	851	851
	843	843	844	844	845	847	848	848	849	851	851
	843	843	843	843	844	845	847	848	848	849	851
	843	843	843	844	845	847	847	848	849	850	851
	843	843	843	844	845	847	847	848	849	850	851
	843	843	843	844	845	847	848	848	849	850	851
	843	843	843	844	845	847	848	848	849	850	851
	843	843	843	844	845	847	848	848	849	850	851
	843	843	843	844	845	847	848	848	849	850	851
	843	843	843	844	845	847	848	848	849	850	851
	843	843	843	844	845	847	848	848	849	850	851
	843	843	843	844	845	847	848	848	849	850	851
Figure 8
x	0	1	2	3	4	5	6	7	8	9	10
G1 - 90	761	760	759	759	758	758	760	761	762	763	763		Probe rotated by 180° => Deviation needs to be multiplied by -1
	758	758	758	758	757	757	760	761	762	762	763
	760	760	759	758	757	757	758	760	761	762	762
	764	762	761	760	760	760	761	762	762	763	764
	760	759	758	757	757	756	757	758	760	761	761
	760	758	757	756	756	755	756	757	758	760	760
	760	758	758	757	757	757	757	759	760	761	761
	761	759	758	758	757	757	757	759	760	761	762
	760	758	757	756	756	756	756	758	758	760	760
	759	757	757	756	755	755	756	757	757	758	759
	760	758	757	756	755	755	756	757	758	759	760
	762	760	760	758	758	758	758	760	761	762	762
G2 - 90	847	846	845	845	844	844	843	844	845	846	847
	847	846	845	845	845	844	844	844	845	846	847
	847	846	845	845	845	844	844	844	845	846	847
	847	846	845	845	845	844	844	844	845	846	847
	847	846	845	845	845	844	844	844	845	846	847
	847	846	845	845	845	844	844	844	845	846	847
	847	846	845	845	845	844	843	844	845	846	847
	847	846	845	845	845	844	843	844	845	846	847
	847	846	845	845	845	844	843	844	845	846	847
	847	846	845	845	845	844	843	844	845	846	847
	847	846	845	845	845	844	843	844	845	846	847
	847	846	845	845	845	844	843	844	845	846	847
Figure 10a
x	0	0.2	0.4	0.6	0.8	1	1.2	1.4	1.6	1.8	2	2.2	2.4	2.6	2.8	3	3.2	3.4	3.6	3.8	4	4.2	4.4	4.6	4.8	5	5.2	5.4	5.6	5.8	6	6.2	6.4	6.6	6.8	7	7.2	7.4	7.6	7.8	8	8.2	8.4	8.6	8.8	9	9.2	9.4	9.6
G1 - 0	602	604	603	604	601	601	600	600	599	612	611	586	598	588	647	644	570	489	490	491	493	496	503	502	503	498	502	510	510	506	500	505	509	509	510	510	511	512	511	521	539	538	535	534	532	528	531	549	550
	626	626	625	623	619	618	617	619	617	648	624	580	606	592	659	669	591	496	497	496	498	500	508	508	509	508	510	513	512	511	505	507	521	520	519	520	520	520	520	528	543	534	533	534	535	532	531	551	552
	636	635	634	632	628	627	626	625	624	650	641	599	607	597	658	667	600	492	494	495	496	498	505	504	508	507	508	512	508	504	502	508	513	512	511	512	512	514	513	522	527	534	534	533	531	528	527	551	552
	617	616	614	614	611	611	610	610	609	638	614	588	586	585	640	655	595	487	488	489	491	494	502	501	509	507	509	510	508	505	504	507	504	505	505	505	505	505	505	518	528	530	528	530	526	522	521	548	549
	628	627	626	625	620	619	619	619	619	636	641	590	580	603	649	667	581	485	486	487	488	492	499	498	509	509	510	512	511	507	507	508	511	513	511	511	510	510	511	523	528	529	528	529	527	527	524	544	544
	612	611	610	609	604	603	603	603	602	628	622	591	585	596	643	659	593	487	488	490	491	494	502	503	508	509	510	512	510	507	504	508	508	508	506	507	507	509	509	522	531	534	531	531	528	525	523	545	545
	614	613	612	611	606	604	604	604	604	627	602	608	588	594	638	654	581	493	494	495	497	498	505	505	511	506	511	512	510	507	506	510	513	513	511	511	512	514	515	524	530	533	530	529	528	528	526	548	548
	614	613	612	611	607	605	605	604	604	633	617	589	589	600	642	655	574	491	493	495	496	498	505	505	509	502	510	511	510	506	506	508	509	509	509	509	508	509	509	521	525	525	524	524	525	522	522	546	546
	597	596	596	595	591	589	589	587	588	619	618	607	594	600	642	652	579	497	499	500	500	505	512	511	511	505	512	519	516	515	511	514	518	517	515	515	515	515	517	526	528	528	527	529	528	527	527	549	548
	604	605	604	604	601	600	600	599	599	628	608	563	589	592	631	644	582	488	490	492	493	496	501	502	503	499	507	507	505	504	502	505	513	514	513	513	513	514	514	524	526	526	524	526	525	526	524	546	545
G1 - 90	664	665	667	670	672	681	687	689	682	609	619	592	579	592	631	619	491	496	499	501	502	502	505	510	492	498	510	519	519	523	522	534	533	535	537	541	541	540	541	545	566	559	560	566	574	579	588	587	586
	657	660	662	666	668	670	675	681	682	591	595	575	570	586	623	595	491	495	498	501	502	502	505	506	502	518	525	526	527	531	531	540	542	544	544	546	548	549	549	552	565	564	567	570	579	582	590	587	586
	669	671	673	677	678	679	684	690	688	608	604	587	583	596	633	603	490	492	495	498	499	499	501	503	494	502	509	509	512	515	515	527	528	529	529	529	528	531	531	543	553	547	550	563	573	579	589	589	587
	670	672	675	678	678	681	683	689	693	614	642	588	569	580	628	595	485	489	491	493	496	499	504	505	495	506	516	516	517	521	522	522	536	538	539	544	548	551	549	558	562	561	569	578	581	586	600	600	599
	659	660	663	667	670	672	676	675	678	613	633	605	593	605	631	613	500	504	505	508	509	513	515	515	502	505	516	521	523	525	526	542	545	553	554	558	557	558	555	554	564	560	569	578	581	588	605	604	603
	667	670	672	676	675	678	683	686	688	628	651	608	596	605	644	617	510	511	512	514	514	513	514	513	491	502	506	514	522	526	525	552	553	554	556	557	555	555	555	556	563	563	570	578	580	586	596	594	592
	658	660	662	663	665	667	675	677	679	620	644	613	599	602	630	625	498	502	503	504	505	508	507	507	498	504	508	517	520	520	518	547	552	551	552	553	553	554	553	559	554	557	560	567	569	578	593	592	592
	653	656	659	662	665	665	668	673	678	611	639	612	594	600	630	615	505	506	509	511	513	513	514	513	498	508	514	517	522	525	522	549	553	553	555	562	563	564	560	558	566	568	578	581	582	587	604	603	604
	629	631	635	642	641	647	650	654	659	579	623	630	612	610	633	608	503	502	504	505	504	505	506	505	491	498	510	514	519	521	519	540	541	542	544	547	553	554	554	555	557	558	560	561	563	571	596	595	596
	671	672	673	675	676	678	683	685	690	623	614	593	583	594	644	615	491	496	496	499	503	502	506	505	491	501	504	507	509	511	509	538	540	541	541	541	540	540	539	545	552	555	556	560	565	574	582	581	582
Figure 10b
x	0	0.2	0.4	0.6	0.8	1	1.2	1.4	1.6	1.8	2	2.2	2.4	2.6	2.8	3	3.2	3.4	3.6	3.8	4	4.2	4.4	4.6	4.8	5	5.2	5.4	5.6	5.8	6	6.2	6.4	6.6	6.8	7	7.2	7.4	7.6	7.8	8	8.2	8.4	8.6	8.8	9	9.2	9.4	9.6
G2 - 0	550	549	548	547	547	543	539	546	543	531	522	521	524	519	513	503	491	479	465	450	438	427	411	399	388	380	371	365	362	362	363	366	369	371	371	373	379	387	400	405	408	410	412	416	424	429	429	429	429
	550	549	548	547	547	543	540	545	543	531	522	521	524	519	513	502	489	478	464	449	438	426	411	398	387	380	372	365	361	361	364	366	369	371	370	372	379	387	401	405	408	409	412	416	424	429	429	428	428
	550	549	547	547	547	544	539	545	543	530	522	521	524	520	513	502	489	478	464	450	438	426	411	397	386	379	372	365	361	362	363	366	369	371	369	372	378	387	400	404	407	409	411	415	424	429	429	428	428
	549	548	547	547	547	543	538	545	543	530	522	521	524	519	513	502	489	481	462	450	437	425	410	397	386	379	371	364	361	360	362	365	367	370	368	371	378	387	400	404	406	408	410	415	423	427	427	427	427
	549	548	547	546	547	543	538	545	542	530	521	521	524	519	512	502	488	477	462	448	437	426	411	397	385	379	371	365	362	361	362	365	368	370	368	371	378	386	399	404	406	408	411	415	424	428	428	427	427
	550	548	547	547	547	543	539	545	542	529	521	521	524	519	513	502	489	477	462	448	436	425	410	397	386	379	371	364	361	361	362	365	368	370	368	371	377	387	399	404	406	408	411	415	423	428	428	428	427
	550	548	547	547	547	543	538	545	542	531	521	521	524	519	513	502	489	477	462	448	436	425	411	397	385	378	371	364	361	361	362	365	367	370	368	371	377	386	400	404	406	408	411	415	423	428	428	427	427
	550	548	547	547	547	543	538	545	543	530	522	521	524	520	513	502	489	477	462	448	437	426	410	397	387	380	372	365	361	361	363	365	368	370	368	371	376	387	399	403	406	408	411	415	423	428	428	428	428
	549	548	548	546	547	543	540	545	542	530	521	521	524	520	513	502	489	477	462	447	435	424	410	398	386	378	371	364	361	361	362	365	368	370	368	371	377	387	399	404	406	408	411	415	423	425	428	429	429
	549	548	547	546	547	542	539	545	543	530	521	521	524	520	513	502	489	477	462	448	436	424	410	398	386	380	372	365	362	361	362	366	367	370	368	371	377	386	399	404	406	408	410	415	423	428	428	428	428
G2 - 90	549	549	550	551	553	546	540	549	529	513	505	505	506	500	494	481	469	453	441	430	421	410	401	391	383	381	379	378	378	382	386	390	395	399	398	401	405	414	422	427	431	434	436	441	450	455	455	456	455
	549	549	550	551	552	545	538	546	531	514	506	505	506	501	493	481	467	452	440	429	420	409	398	388	380	377	377	375	376	381	384	388	394	397	396	399	403	411	421	426	429	432	434	439	445	452	453	453	452
	548	548	549	550	551	544	539	546	536	517	508	507	508	502	494	481	468	454	440	431	423	411	400	390	382	380	378	377	377	381	385	390	394	398	397	400	404	412	421	425	429	431	435	439	448	453	454	454	453
	550	550	551	552	554	547	539	546	542	519	508	507	508	502	496	482	469	455	441	432	423	412	400	389	382	379	376	375	376	379	383	387	391	394	393	397	400	407	416	421	424	426	429	433	441	445	446	446	445
	550	551	552	553	554	547	540	544	540	518	508	507	508	503	495	482	468	455	442	433	424	412	400	390	383	380	377	375	376	380	385	402	392	394	393	396	400	408	416	419	424	426	429	434	441	445	446	446	445
	550	550	551	553	554	547	540	546	540	520	508	507	508	503	494	483	470	455	441	432	424	413	400	390	382	380	377	375	376	379	384	387	410	395	393	396	400	409	416	421	424	426	429	434	440	445	446	446	445
	550	550	550	552	554	547	542	551	539	517	507	505	505	500	491	479	466	451	438	430	422	411	401	389	381	378	376	375	376	379	383	387	392	394	393	396	399	408	416	421	424	426	429	433	441	445	446	446	445
	550	550	551	552	554	546	539	546	541	518	508	507	508	502	494	482	469	455	445	431	422	412	400	390	382	379	377	376	376	381	386	390	393	397	395	398	402	410	419	423	426	429	431	436	444	449	450	450	449
	550	550	550	552	553	547	540	545	541	519	508	507	508	502	494	482	469	455	441	432	424	412	400	389	382	378	377	375	375	381	385	390	394	396	394	397	402	410	418	422	425	428	431	436	444	449	449	450	448
	549	549	550	552	553	544	539	547	540	518	508	507	508	502	494	481	468	454	441	430	422	410	399	388	381	378	377	376	376	381	385	389	394	397	395	398	402	410	419	422	426	429	432	436	444	449	450	450	449
Figure 11a
x	0	0.2	0.4	0.6	0.8	1	1.2	1.4	1.6	1.8	2	2.2	2.4	2.6	2.8	3	3.2	3.4	3.6	3.8	4	4.2	4.4	4.6	4.8	5	5.2	5.4	5.6	5.8	6	6.2	6.4	6.6	6.8	7	7.2	7.4	7.6	7.8	8	8.2	8.4	8.6	8.8	9	9.2	9.4	9.6
G1 - 0	555	551	549	545	537	526	511	505	584	534	522	523	576	614	486	499	516	530	549	554	559	562	531	557	561	558	565	574	591	570	575	576	578	578	575	579	583	566	554	552	550	556	565	564	595	595	590	585	579
	551	547	545	538	530	521	507	500	554	534	509	517	571	602	484	498	513	527	538	545	547	543	520	542	553	553	560	566	587	553	559	561	564	569	568	569	570	554	546	543	545	552	559	559	589	586	582	578	575
	561	558	556	549	540	521	504	489	567	539	514	525	577	612	480	503	518	532	548	558	561	559	533	550	564	550	571	572	598	571	573	580	579	578	577	581	584	568	551	554	558	561	565	560	592	592	588	584	580
	560	557	555	548	531	512	498	483	525	511	538	549	602	619	470	492	511	525	544	559	559	558	533	559	569	563	569	577	588	566	572	574	575	576	577	581	585	570	557	556	558	564	568	563	599	597	591	587	584
	554	551	548	542	532	518	499	493	548	531	538	553	606	624	488	499	516	530	547	555	555	553	526	551	570	570	569	572	584	559	561	567	568	568	569	575	580	569	555	545	545	550	552	549	586	584	580	575	570
	558	554	553	548	537	525	506	499	524	535	538	553	600	618	492	502	516	529	543	551	557	555	524	560	563	561	564	584	590	557	566	571	570	574	571	575	578	565	551	541	542	549	552	549	584	583	578	575	571
	567	563	561	557	545	528	508	502	536	538	552	563	603	623	492	509	526	538	553	558	558	556	533	579	569	573	571	581	591	555	576	578	576	579	585	588	587	567	555	551	550	556	559	554	595	595	589	585	580
	556	553	551	552	539	528	511	501	535	536	546	565	618	622	485	502	518	530	546	554	560	560	533	566	569	567	564	573	583	559	565	573	575	575	575	579	583	562	548	536	539	549	552	548	586	583	578	575	572
	561	558	557	552	541	531	514	488	566	550	561	577	619	628	484	508	530	540	556	562	564	568	542	580	577	578	581	587	595	570	578	581	581	584	587	590	595	580	569	560	558	566	569	563	603	599	595	591	587
	558	555	554	550	539	528	514	491	539	536	550	558	599	624	496	505	520	532	548	553	556	557	531	558	564	566	571	575	585	565	574	579	578	579	583	589	592	575	561	549	551	557	558	554	598	597	593	589	584
G1 - 90	570	565	565	567	557	548	534	502	555	533	507	494	542	617	602	517	533	543	565	571	573	577	555	569	580	580	581	581	584	579	586	582	579	585	585	588	592	584	557	550	565	566	568	563	582	604	599	596	590
	566	564	562	560	553	544	525	506	577	569	594	581	641	654	594	502	517	527	542	549	555	561	545	555	567	571	571	569	565	561	572	571	565	570	569	574	578	575	553	542	548	547	548	546	565	586	581	577	573
	557	554	553	552	544	535	527	496	552	559	576	573	625	642	592	506	525	534	550	559	564	569	553	571	575	585	582	582	581	575	582	583	583	590	583	583	586	583	570	556	560	561	564	560	575	597	593	588	583
	571	568	568	566	556	550	532	500	565	564	588	579	638	656	586	505	525	535	550	558	563	569	554	570	574	581	579	576	574	565	572	574	575	579	573	577	581	574	559	547	558	560	561	556	576	595	590	585	580
	566	563	562	559	550	544	533	504	582	565	542	538	592	629	590	509	527	538	552	559	564	569	547	567	569	575	569	573	570	564	564	565	571	575	574	578	582	575	562	543	548	550	555	552	573	594	590	586	581
	555	554	552	552	544	534	525	497	578	572	558	576	626	642	592	512	527	538	548	555	563	573	549	552	556	572	578	571	573	566	581	576	573	578	570	573	578	579	561	550	551	552	552	550	570	589	585	583	577
	563	558	558	556	544	535	526	496	574	566	577	575	632	644	590	506	524	532	547	553	562	570	544	559	565	575	580	579	575	563	574	579	573	579	573	576	581	580	560	547	551	550	556	552	574	593	590	586	580
	565	563	561	558	547	537	528	504	577	562	562	570	626	644	593	510	526	536	549	555	562	570	552	561	564	575	579	574	573	566	577	575	570	574	566	569	574	573	554	547	549	551	554	549	570	588	584	580	574
	565	563	561	559	551	543	529	503	598	607	562	585	635	651	596	503	523	537	552	557	568	574	553	563	569	582	582	580	582	577	586	584	582	584	578	581	585	583	568	554	558	560	564	560	580	600	597	595	589
	566	564	562	561	550	541	531	508	605	577	572	576	619	654	582	511	528	539	552	559	566	574	551	569	572	584	584	579	579	571	584	580	578	583	575	576	579	579	568	550	556	558	563	559	576	597	592	587	583
Figure 11b
x	0	0.2	0.4	0.6	0.8	1	1.2	1.4	1.6	1.8	2	2.2	2.4	2.6	2.8	3	3.2	3.4	3.6	3.8	4	4.2	4.4	4.6	4.8	5	5.2	5.4	5.6	5.8	6	6.2	6.4	6.6	6.8	7	7.2	7.4	7.6	7.8	8	8.2	8.4	8.6	8.8	9	9.2	9.4	9.6
G2 - 0	290	290	289	290	290	287	284	290	289	293	302	304	304	303	299	296	296	300	311	313	309	298	292	288	288	285	284	284	286	283	282	279	275	271	273	277	283	285	284	284	284	284	283	283	283	283	283	283	283
	289	289	289	290	290	286	283	291	290	293	303	305	304	304	300	296	296	301	313	314	309	299	293	290	289	286	284	284	286	284	282	279	273	271	273	277	284	286	284	284	284	284	283	283	283	283	283	283	283
	289	289	288	290	290	287	284	291	290	293	303	305	304	304	299	296	297	301	313	313	308	298	293	290	289	286	285	285	286	284	282	280	273	272	273	277	284	286	285	284	284	285	284	284	284	284	284	284	284
	289	289	288	290	289	285	283	291	290	294	303	305	305	304	300	296	296	301	313	314	310	299	294	291	289	286	285	285	287	284	283	280	271	272	273	278	284	286	285	285	284	284	284	284	284	284	284	284	284
	291	291	291	291	290	286	293	297	295	299	307	309	308	308	304	300	300	305	316	318	313	303	298	295	293	290	289	288	290	288	285	282	274	274	275	279	286	287	286	286	286	285	285	285	285	284	284	284	285
	291	291	291	290	288	290	293	297	295	299	307	309	308	308	304	300	300	305	316	318	313	303	297	294	292	289	288	288	289	287	285	282	273	273	275	279	286	287	286	286	286	286	286	284	284	285	285	285	285
	291	291	291	290	289	290	293	297	295	299	307	309	309	308	304	300	300	305	316	317	313	303	298	295	292	289	288	288	289	287	284	282	273	273	274	278	286	287	286	285	285	285	285	284	284	284	285	285	284
	291	291	291	291	288	286	293	297	295	299	307	309	309	307	304	300	300	304	315	316	312	303	298	295	292	289	288	288	289	287	285	282	273	273	274	279	286	287	286	286	285	285	285	284	284	284	284	284	284
	291	291	291	291	289	287	293	297	295	299	308	309	309	308	304	300	300	305	316	317	313	303	298	295	292	289	288	288	289	287	284	282	274	272	274	279	286	287	287	286	286	286	285	284	284	284	285	284	284
	291	291	291	291	289	287	293	297	295	299	307	309	309	308	304	300	300	305	315	316	313	304	299	295	293	289	288	288	289	287	285	282	274	273	274	279	286	288	287	286	286	286	285	285	285	285	285	285	285
G2 - 90	307	307	305	304	301	304	307	303	303	307	314	316	316	313	309	308	306	315	325	326	321	312	307	305	305	303	304	304	304	301	298	294	289	286	286	291	301	304	304	302	302	302	302	303	303	303	303	303	303
	307	306	305	302	301	303	306	301	301	305	312	313	314	311	307	306	304	313	323	325	320	312	306	304	304	302	303	303	304	301	298	295	289	288	288	293	303	306	305	304	304	304	304	305	305	306	306	306	306
	307	307	306	302	299	304	306	300	301	305	312	313	314	311	307	306	304	313	323	325	320	312	307	304	304	302	303	304	304	301	299	294	289	287	288	293	303	306	305	305	304	304	304	305	305	305	306	306	306
	307	307	306	303	300	304	306	301	301	306	312	314	314	311	307	305	304	313	324	326	321	313	307	304	304	302	303	303	304	300	298	295	289	288	288	293	303	306	306	305	304	304	304	305	305	305	306	306	306
	307	307	306	303	300	304	306	300	301	305	312	313	314	310	307	305	304	313	324	325	320	312	306	304	304	302	303	303	303	300	298	294	289	287	288	293	303	305	305	304	304	304	304	305	305	305	305	306	306
	307	306	305	302	301	304	306	300	301	305	312	313	313	310	306	306	304	314	324	325	320	312	307	304	304	302	303	303	303	300	298	295	288	287	288	293	303	306	305	304	303	304	304	305	305	305	305	306	306
	307	307	305	301	300	304	306	300	301	305	311	313	313	310	307	306	304	313	324	324	319	311	306	303	303	301	302	302	302	299	296	293	287	286	286	291	301	304	303	302	301	301	301	302	302	302	302	302	302
	307	306	305	302	300	304	304	298	298	303	309	311	312	308	304	303	302	311	321	322	317	308	303	301	301	299	300	300	301	298	295	291	286	285	286	291	301	304	304	302	302	302	302	302	303	303	303	303	303
	307	307	304	301	300	303	304	298	298	303	309	310	311	307	304	303	301	311	321	321	316	308	303	300	300	298	299	299	299	297	295	290	285	285	285	290	301	304	303	302	301	301	301	302	302	302	303	303	303
	307	306	305	301	299	303	304	298	298	303	309	310	311	307	304	303	301	310	320	321	316	307	303	300	300	298	300	299	300	297	295	291	286	284	285	290	301	304	304	303	301	301	301	302	303	303	303	303	303
Figure 13
t	0	0.0001	0.0002	0.0003	0.0004	0.0005	0.0006	0.0007	0.0008	0.0009	0.001	0.0011	0.0012	0.0013	0.0014	0.0015	0.0016	0.0017	0.0018	0.0019	0.002	0.0021	0.0022	0.0023	0.0024	0.0025	0.0026	0.0027	0.0028	0.0029	0.003	0.0031	0.0032	0.0033	0.0034	0.0035	0.0036	0.0037	0.0038	0.0039	0.004	0.0041	0.0042	0.0043	0.0044	0.0045	0.0046	0.0047	0.0048
a P1	-78.5839	-78.4741	-78.3871	-78.4741	-78.4878	-78.4329	-78.4969	-78.4374	-78.6846	-78.7212	-78.5885	-78.6068	-78.6617	-78.5336	-75.5856	-75.3155	-75.3796	-75.6176	-75.613	-75.5856	-75.5489	-75.7092	-75.6954	-72.0013	-72.0745	-72.1523	-72.134	-72.047	-71.8548	-71.8639	-71.928	-71.8777	-66.888	-66.8239	-66.8285	-66.9567	-66.9475	-66.9521	-67.0299	-67.181	-67.3138	-61.0286	-60.8913	-61.0058	-61.1614	-61.1294	-61.0195	-60.9646	-61.1477
a P2	-34.4322	-34.4627	-34.5756	-34.6458	-34.655	-34.6	-34.8014	-35.6193	-35.5247	-35.4728	-35.4179	-35.5064	-35.4423	-35.3508	-35.2958	-35.3019	-35.427	-35.2836	-35.3599	-35.3874	-35.5003	-35.4576	-35.4545	-35.4362	-36.4128	-36.5043	-36.4891	-36.3609	-36.4128	-36.486	-36.4341	-36.4555	-36.4677	-36.4463	-36.5898	-36.5989	-36.5898	-36.6142	-36.5593	-36.544	-36.4006	-36.3853	-37.3832	-37.3985	-37.3649	-37.1879	-37.249	-37.3283	-37.2612
Figure 14
t	0	0.0001	0.0002	0.0003	0.0004	0.0005	0.0006	0.0007	0.0008	0.0009	0.001	0.0011	0.0012	0.0013	0.0014	0.0015	0.0016	0.0017	0.0018	0.0019	0.002	0.0021	0.0022	0.0023	0.0024	0.0025	0.0026	0.0027	0.0028	0.0029	0.003	0.0031	0.0032	0.0033	0.0034	0.0035	0.0036	0.0037	0.0038	0.0039	0.004	0.0041	0.0042	0.0043	0.0044	0.0045	0.0046	0.0047	0.0048
a P1	-213.962	-213.697	-213.646	-213.774	-213.697	-213.817	-203.623	-203.563	-203.367	-203.486	-203.495	-203.606	-203.76	-203.503	-200.769	-182.901	-182.756	-182.551	-182.508	-182.414	-182.449	-182.423	-182.337	-158.13	-148.833	-148.764	-148.807	-148.867	-149.046	-149.243	-149.294	-148.961	-137.383	-136.707	-136.69	-136.571	-136.528	-136.784	-136.733	-136.938	-136.793	-104.057	-103.955	-104.262	-104.587	-104.527	-104.638	-104.57	-104.262
a P2	-19.7239	-19.6854	-19.6653	-19.5664	-19.7037	-19.733	-19.6946	-19.755	-19.7715	-19.7953	-19.7165	-19.7404	-19.7898	-19.7532	-19.7275	-19.7056	-19.7495	-19.7788	-19.766	-19.7349	-18.7351	-18.7809	-18.7992	-18.8028	-18.7754	-18.8779	-18.7754	-18.7278	-18.6857	-18.704	-18.7205	-18.6674	-18.6362	-18.6014	-18.6161	-18.6051	-18.6106	-18.66	-15.5289	-15.6113	-15.6534	-15.626	-15.6003	-15.6498	-15.6534	-15.6516	-12.5296	-10.4221	-10.4953
Figure 15
t	0	0.0001	0.0002	0.0003	0.0004	0.0005	0.0006	0.0007	0.0008	0.0009	0.001	0.0011	0.0012	0.0013	0.0014	0.0015	0.0016	0.0017	0.0018	0.0019	0.002	0.0021	0.0022	0.0023	0.0024	0.0025	0.0026	0.0027	0.0028	0.0029	0.003	0.0031	0.0032	0.0033	0.0034	0.0035	0.0036	0.0037	0.0038	0.0039	0.004	0.0041	0.0042	0.0043	0.0044	0.0045	0.0046	0.0047	0.0048
a P1	-133.827	-133.9	-133.891	-133.708	-133.79	-131.849	-131.858	-131.84	-131.849	-131.954	-131.854	-131.749	-131.826	-126.452	-124.644	-124.557	-124.658	-124.612	-124.708	-124.63	-124.713	-124.722	-117.15	-116.299	-116.235	-116.189	-116.166	-116.111	-116.217	-116.015	-116.061	-103.642	-103.66	-103.637	-103.578	-103.752	-103.775	-103.784	-103.77	-103.788	-92.2251	-92.2251	-92.28	-92.1153	-92.042	-92.2388	-92.3487	-92.2343	-92.3029
a P2	-5.26992	-5.29739	-5.33035	-5.24612	-5.21499	-5.22598	-5.16006	-5.16738	-5.21499	-5.2095	-5.32119	-5.345	-5.35781	-5.36148	-5.44937	-5.4512	-5.47866	-5.42007	-5.40908	-5.45669	-5.41275	-5.32119	-5.26992	-5.28457	-5.31387	-5.28457	-5.28091	-5.29739	-5.35598	-5.38711	-5.37429	-5.28823	-5.30288	-5.34866	-5.27175	-5.24063	-5.19302	-5.1857	-5.17288	-5.19851	-5.22964	-5.30288	-5.37063	-5.35049	-5.35781	-5.38162	-5.45303	-5.46951	-5.44571
Figure 17
x	0	0.002	0.004	0.006	0.008	0.01	0.012	0.014	0.016	0.018	0.02	0.022	0.024	0.026	0.028	0.03	0.032	0.034	0.036	0.038	0.04	0.042	0.044	0.046	0.048	0.05	0.052	0.054	0.056	0.058	0.06	0.062	0.064	0.066	0.068	0.07	0.072	0.074	0.076	0.078	0.08	0.082	0.084	0.086	0.088	0.09	0.092	0.094	0.096
FG1	0.000416684	0.00125594	0.00159642	0.00139142	0.00165754	0.00166702	0.00154276	0.00188642	0.00220583	0.00223873	0.00235397	0.0023622	0.00229319	0.0022893	0.00253192	0.003435	0.0048296	0.0055034	0.00618148	0.00739225	0.00826047	0.00890288	0.00935796	0.00967117	0.00991377	0.0101666	0.0103422	0.0107319	0.0108103	0.0106029	0.0106158	0.0102184	0.0102095	0.0103558	0.0102551	0.010016	0.0102262	0.0104631	0.010659	0.0108256	0.011174	0.0118645	0.0123961	0.012168	0.0125196	0.0128911	0.0128547	0.0126571	0.0125384
Figure 18
x	0	0.002	0.004	0.006	0.008	0.01	0.012	0.014	0.016	0.018	0.02	0.022	0.024	0.026	0.028	0.03	0.032	0.034	0.036	0.038	0.04	0.042	0.044	0.046	0.048	0.05	0.052	0.054	0.056	0.058	0.06	0.062	0.064	0.066	0.068	0.07	0.072	0.074	0.076	0.078	0.08	0.082	0.084	0.086	0.088	0.09	0.092	0.094	0.096
FG2	0.00156382	0.00294003	0.00386655	0.00484294	0.00611721	0.00693092	0.00754592	0.00820874	0.00837533	0.00831068	0.00857484	0.00856739	0.00858226	0.00858388	0.00843736	0.008379	0.00854282	0.00854794	0.00925797	0.0095321	0.0102201	0.0110096	0.0105318	0.0104405	0.011017	0.0116794	0.0125935	0.0133265	0.0138314	0.014326	0.0149288	0.0159615	0.0168734	0.0176143	0.0184501	0.0190512	0.0200029	0.0206476	0.0213406	0.0221865	0.0232075	0.0243158	0.0250029	0.025819	0.026775	0.0277252	0.0286584	0.0301032	0.0318081
[truncated: 5,000 more columns]
